# Supplementary material
Source: ML conference proceedings conference paper supplement (https://proceedings.mlr.press/v97/houlsby19a.html)
Supplement: Supplementary file [file houlsby19a-supp.pdf]

---

## Supplementary Material for Parameter-Efficient Transfer Learning for NLP

---

### A. Additional Text Classification Tasks

| Dataset                            | Train examples | Validation examples | Test examples | Classes | Avg text length | Reference              |
|------------------------------------|----------------|---------------------|---------------|---------|-----------------|------------------------|
| 20 newsgroups                      | 15076          | 1885                | 1885          | 20      | 1903            | (Lang, 1995)           |
| Crowdfower airline                 | 11712          | 1464                | 1464          | 3       | 104             | crowdfower.com         |
| Crowdfower corporate messaging     | 2494           | 312                 | 312           | 4       | 121             | crowdfower.com         |
| Crowdfower disasters               | 8688           | 1086                | 1086          | 2       | 101             | crowdfower.com         |
| Crowdfower economic news relevance | 6392           | 799                 | 800           | 2       | 1400            | crowdfower.com         |
| Crowdfower emotion                 | 32000          | 4000                | 4000          | 13      | 73              | crowdfower.com         |
| Crowdfower global warming          | 3380           | 422                 | 423           | 2       | 112             | crowdfower.com         |
| Crowdfower political audience      | 4000           | 500                 | 500           | 2       | 205             | crowdfower.com         |
| Crowdfower political bias          | 4000           | 500                 | 500           | 2       | 205             | crowdfower.com         |
| Crowdfower political message       | 4000           | 500                 | 500           | 9       | 205             | crowdfower.com         |
| Crowdfower primary emotions        | 2019           | 252                 | 253           | 18      | 87              | crowdfower.com         |
| Crowdfower progressive opinion     | 927            | 116                 | 116           | 3       | 102             | crowdfower.com         |
| Crowdfower progressive stance      | 927            | 116                 | 116           | 4       | 102             | crowdfower.com         |
| Crowdfower US economic performance | 3961           | 495                 | 496           | 2       | 305             | crowdfower.com         |
| Customer complaint database        | 146667         | 18333               | 18334         | 157     | 1046            | catalog.data.gov       |
| News aggregator dataset            | 338349         | 42294               | 42294         | 4       | 57              | (Lichman, 2013)        |
| SMS spam collection                | 4459           | 557                 | 558           | 2       | 81              | (Almeida et al., 2011) |

Table 1. Statistics and references for the additional text classification tasks.

| Dataset                            | Epochs (Fine-tune) | Epochs (Adapters) |
|------------------------------------|--------------------|-------------------|
| 20 newsgroups                      | 50                 | 50                |
| Crowdfower airline                 | 50                 | 20                |
| Crowdfower corporate messaging     | 100                | 50                |
| Crowdfower disasters               | 50                 | 50                |
| Crowdfower economic news relevance | 20                 | 20                |
| Crowdfower emotion                 | 20                 | 20                |
| Crowdfower global warming          | 100                | 50                |
| Crowdfower political audience      | 50                 | 20                |
| Crowdfower political bias          | 50                 | 50                |
| Crowdfower political message       | 50                 | 50                |
| Crowdfower primary emotions        | 100                | 100               |
| Crowdfower progressive opinion     | 100                | 100               |
| Crowdfower progressive stance      | 100                | 100               |
| Crowdfower US economic performance | 100                | 20                |
| Customer complaint database        | 20                 | 20                |
| News aggregator dataset            | 20                 | 20                |
| SMS spam collection                | 50                 | 20                |

Table 2. Number of training epochs selected for the additional classification tasks.

| Parameter                              | Search Space                                    |
|----------------------------------------|-------------------------------------------------|
| 1) Input embedding modules             | Refer to Table 4                                |
| 2) Fine-tune input embedding module    | {True, False}                                   |
| 3) Lowercase text                      | {True, False}                                   |
| 4) Remove non alphanumeric text        | {True, False}                                   |
| 5) Use convolution                     | {True, False}                                   |
| 6) Convolution activation              | {relu, relu6, leaky relu, swish, sigmoid, tanh} |
| 7) Convolution batch norm              | {True, False}                                   |
| 8) Convolution max ngram length        | {2, 3}                                          |
| 9) Convolution dropout rate            | [0.0, 0.4]                                      |
| 10) Convolution number of filters      | [50, 200]                                       |
| 11) Convolution embedding dropout rate | [0.0, 0.4]                                      |
| 12) Number of hidden layers            | {0, 1, 2, 3, 5}                                 |
| 13) Hidden layers size                 | {64, 128, 256}                                  |
| 14) Hidden layers activation           | {relu, relu6, leaky relu, swish, sigmoid, tanh} |
| 15) Hidden layers normalization        | {none, batch norm, layer norm}                  |
| 16) Hidden layers dropout rate         | {0.0, 0.05, 0.1, 0.2, 0.3, 0.4, 0.5}            |
| 17) Deep tower learning rate           | {0.001, 0.005, 0.01, 0.05, 0.1, 0.5}            |
| 18) Deep tower regularization weight   | {0.0, 0.0001, 0.001, 0.01}                      |
| 19) Wide tower learning rate           | {0.001, 0.005, 0.01, 0.05, 0.1, 0.5}            |
| 20) Wide tower regularization weight   | {0.0, 0.0001, 0.001, 0.01}                      |
| 21) Number of training samples         | {1e5, 2e5, 5e5, 1e6, 2e6}                       |

Table 3. The search space of baseline models for the additional text classification tasks.

| ID                         | Dataset size (tokens) | Embed dim. | Vocab. size | Training algorithm | TensorFlow Hub Handles<br>Prefix: <a href="https://tfhub.dev/google/">https://tfhub.dev/google/</a> |
|----------------------------|-----------------------|------------|-------------|--------------------|-----------------------------------------------------------------------------------------------------|
| English-small              | 7B                    | 50         | 982k        | Lang. model        | nnlm-en-dim50-with-normalization/1                                                                  |
| English-big                | 200B                  | 128        | 999k        | Lang. model        | nnlm-en-dim128-with-normalization/1                                                                 |
| English-wiki-small         | 4B                    | 250        | 1M          | Skipgram           | Wiki-words-250-with-normalization/1                                                                 |
| English-wiki-big           | 4B                    | 500        | 1M          | Skipgram           | Wiki-words-500-with-normalization/1                                                                 |
| Universal-sentence-encoder | -                     | 512        | -           | (Cer et al., 2018) | universal-sentence-encoder/2                                                                        |

Table 4. Options for text input embedding modules. These are pre-trained text embedding tables. We provide the handle for the modules that are publicly distributed via the TensorFlow Hub service (<https://www.tensorflow.org/hub>).

## B. Learning Rate Robustness

We test the robustness of adapters and fine-tuning to the learning rate. We ran experiments with learning rates in the range  $[2 \cdot 10^{-5}, 10^{-3}]$ , and selected the best hyperparameters for each method at each learning rate. Figure 1 shows the results.

## Parameter-Efficient Transfer Learning for NLP

| Dataset                             | 1                          | 2     | 3     | 4     | 5     | 6          | 7     | 8 | 9    | 10  | 11   | 12 | 13  | 14         | 15         | 16   | 17    | 18     | 19    | 20     | 21      |
|-------------------------------------|----------------------------|-------|-------|-------|-------|------------|-------|---|------|-----|------|----|-----|------------|------------|------|-------|--------|-------|--------|---------|
| 20 newsgroups                       | Universal-sentence-encoder | False | True  | True  | False | relu6      | False | 2 | 0.37 | 94  | 0.38 | 1  | 128 | leaky relu | batch norm | 0.5  | 0.5   | 0      | 0.05  | 0.0001 | 100000  |
| Crowdflower airline                 | English-big                | False | False | False | True  | leaky relu | True  | 3 | 0.36 | 200 | 0.07 | 0  | 128 | tanh       | layer norm | 0.4  | 0.1   | 0.001  | 0.05  | 0.001  | 200000  |
| Crowdflower corporate messaging     | English-big                | False | False | True  | True  | tanh       | True  | 3 | 0.40 | 56  | 0.40 | 1  | 64  | tanh       | batch norm | 0.5  | 0.5   | 0.001  | 0.01  | 0      | 200000  |
| Crowdflower disasters               | Universal-sentence-encoder | True  | True  | False | True  | swish      | True  | 3 | 0.27 | 52  | 0.22 | 0  | 64  | relu       | none       | 0.2  | 0.005 | 0.0001 | 0.005 | 0.01   | 500000  |
| Crowdflower economic news relevance | Universal-sentence-encoder | True  | True  | False | False | leaky relu | False | 2 | 0.27 | 63  | 0.04 | 3  | 128 | swish      | layer norm | 0.2  | 0.01  | 0.01   | 0.001 | 0      | 100000  |
| Crowdflower emotion                 | Universal-sentence-encoder | False | True  | False | False | relu6      | False | 3 | 0.35 | 132 | 0.34 | 1  | 64  | tanh       | none       | 0.05 | 0.05  | 0      | 0.05  | 0      | 200000  |
| Crowdflower global warming          | Universal-sentence-encoder | False | True  | True  | False | swish      | False | 3 | 0.39 | 200 | 0.36 | 1  | 128 | leaky relu | batch norm | 0.4  | 0.05  | 0      | 0.001 | 0.001  | 1000000 |
| Crowdflower political audience      | English-small              | True  | False | True  | True  | relu       | False | 3 | 0.11 | 98  | 0.07 | 0  | 64  | relu       | none       | 0.5  | 0.05  | 0.001  | 0.001 | 0      | 100000  |
| Crowdflower political bias          | English-big                | False | True  | True  | False | swish      | False | 3 | 0.12 | 81  | 0.30 | 0  | 64  | relu6      | none       | 0    | 0.01  | 0      | 0.005 | 0.01   | 200000  |
| Crowdflower political message       | Universal-sentence-encoder | False | False | True  | False | swish      | True  | 2 | 0.36 | 57  | 0.35 | 0  | 64  | tanh       | none       | 0.5  | 0.01  | 0.001  | 0.005 | 0      | 200000  |
| Crowdflower primary emotions        | English-big                | False | True  | True  | True  | swish      | False | 3 | 0.40 | 191 | 0.03 | 0  | 256 | relu6      | none       | 0.5  | 0.1   | 0.001  | 0.05  | 0      | 200000  |
| Crowdflower progressive opinion     | English-big                | True  | False | True  | True  | relu6      | False | 3 | 0.40 | 199 | 0.28 | 0  | 128 | relu       | batch norm | 0.3  | 0.1   | 0.01   | 0.005 | 0.001  | 200000  |
| Crowdflower progressive stance      | Universal-sentence-encoder | True  | False | True  | False | relu       | True  | 3 | 0.01 | 195 | 0.00 | 2  | 256 | tanh       | layer norm | 0.4  | 0.005 | 0      | 0.005 | 0.0001 | 500000  |
| Crowdflower us economic performance | English-big                | True  | True  | True  | True  | tanh       | True  | 2 | 0.31 | 53  | 0.24 | 1  | 256 | leaky relu | batch norm | 0.3  | 0.05  | 0.0001 | 0.001 | 0.0001 | 100000  |
| Customer complaint database         | English-big                | True  | False | False | False | tanh       | False | 2 | 0.03 | 69  | 0.10 | 1  | 256 | leaky relu | layer norm | 0.1  | 0.05  | 0.0001 | 0.05  | 0.001  | 1000000 |
| News aggregator dataset             | Universal-sentence-encoder | False | True  | True  | False | sigmoid    | True  | 2 | 0.00 | 156 | 0.29 | 3  | 256 | relu       | batch norm | 0.05 | 0.05  | 0      | 0.5   | 0.0001 | 1000000 |
| Sms spam collection                 | English-wiki-small         | True  | True  | True  | True  | leaky relu | False | 3 | 0.20 | 54  | 0.00 | 1  | 128 | leaky relu | batch norm | 0    | 0.1   | 0      | 0.05  | 0.01   | 1000000 |

Table 5. Search space parameters (see Table 3) for the AutoML baseline models that were selected.

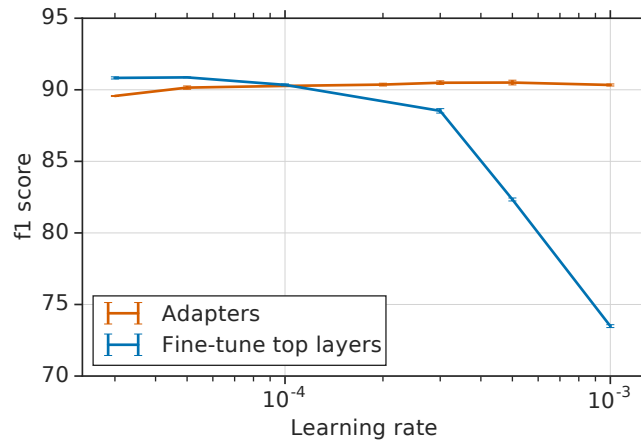

Figure 1. Best performing models at different learning rates. Error vars indicate the s.e.m. across three random seeds.

## References

- Almeida, T. A., Hidalgo, J. M. G., and Yamakami, A. Contributions to the Study of SMS Spam Filtering: New Collection and Results. In *Proceedings of the 11th ACM Symposium on Document Engineering*. ACM, 2011.
- Cer, D., Yang, Y., Kong, S.-y., Hua, N., Limtiaco, N., John, R. S., Constant, N., Guajardo-Cespedes, M., Yuan, S., Tar, C., et al. Universal sentence encoder. *arXiv preprint arXiv:1803.11175*, 2018.
- Lang, K. Newsweeder: Learning to filter netnews. In *ICML*, 1995.
- Lichman, M. UCI machine learning repository, 2013.
